# Supplementary material for: Coffee or Tea? A prospective cohort study on the associations of coffee and tea intake with overall and cause-specific mortality in men versus women
Source: Eur J Epidemiol. 2018 Jan 27;33(2):183–200. doi: 10.1007/s10654-018-0359-y (PMC5871637; doi:10.1007/s10654-018-0359-y)
Supplement: Supplementary file 1 — Supplementary material 1 (PDF 420 kb) [file 10654_2018_359_MOESM1_ESM.pdf]

**SUPPLEMENTARY MATERIALS****European Journal of Epidemiology**

Article Title:

**Coffee or Tea?****A prospective cohort study on the associations of coffee and tea intake with overall and cause-specific mortality in men versus women**

Piet A. van den Brandt<sup>1,2</sup>

<sup>1</sup> Maastricht University Medical Centre, GROW- School for Oncology and Developmental Biology, Department of Epidemiology, Maastricht, the Netherlands

<sup>2</sup> Maastricht University Medical Centre, CAPHRI- School for Public Health and Primary Care, Department of Epidemiology, Maastricht, the Netherlands

**Address for correspondence:**

Piet A. van den Brandt, PhD;

Maastricht University Medical Centre; Department of Epidemiology; PO Box 616; 6200 MD Maastricht; The Netherlands; Tel.: +31 (0)43 3882361; E-mail:

[PA.vandenBrandt@maastrichtuniversity.nl](mailto:PA.vandenBrandt@maastrichtuniversity.nl)

Supplementary Table 1. Overall mortality by categories of intake of coffee and tea in men and women respectively, in multivariable-adjusted<sup>a</sup> interaction analyses.

|                                    | Tea (cups/day) (median) |                    |                    | <i>P</i>      |
|------------------------------------|-------------------------|--------------------|--------------------|---------------|
| Coffee (cups/day)                  | 0-<2 cups/d             | 2-<4 cups/d        | 4+ cups/d          | heterogeneity |
| Men                                |                         |                    |                    |               |
| 5+ cups/day                        |                         |                    |                    | 0.908         |
| Deaths / Person-yrs                | 1159 / 2502             | 954 / 2483         | 587 / 1466         |               |
| Multivariable-adjusted HR (95% CI) | 1 (Ref)                 | 0.82 (0.65 - 1.03) | 0.77 (0.59 - 1.01) |               |
| 2-<5 cups/day                      |                         |                    |                    |               |
| Deaths / Person-yrs                | 625 / 1464              | 1056 / 2619        | 954 / 2382         |               |
| Multivariable-adjusted HR (95% CI) | 0.90 (0.69 - 1.19)      | 0.79 (0.62 - 1.00) | 0.81 (0.63 - 1.04) |               |
| 0-<2 cups/day                      |                         |                    |                    |               |
| Deaths / Person-yrs                | 61 / 163                | 76 / 259           | 164 / 451          |               |
| Multivariable-adjusted HR (95% CI) | 0.84 (0.43 - 1.63)      | 0.74 (0.45 - 1.22) | 0.86 (0.57 - 1.30) |               |
| Women                              |                         |                    |                    |               |
| 5+ cups/day                        |                         |                    |                    | 0.422         |
| Deaths / Person-yrs                | 344 / 1588              | 329 / 2127         | 268 / 1455         |               |
| Multivariable-adjusted HR (95% CI) | 1 (Ref)                 | 0.91 (0.67 - 1.24) | 1.04 (0.73 - 1.47) |               |
| 2-<5 cups/day                      |                         |                    |                    |               |
| Deaths / Person-yrs                | 289 / 1676              | 689 / 3735         | 818 / 4399         |               |
| Multivariable-adjusted HR (95% CI) | 0.90 (0.64 - 1.25)      | 1.05 (0.79 - 1.39) | 1.07 (0.80 - 1.44) |               |
| 0-<2 cups/day                      |                         |                    |                    |               |
| Deaths / Person-yrs                | 34 / 115                | 77 / 245           | 181 / 767          |               |
| Multivariable-adjusted HR (95% CI) | 2.11 (0.99 - 4.53)      | 1.92 (1.06 - 3.45) | 1.40 (0.93 - 2.09) |               |

<sup>a</sup> Multivariable analyses were adjusted for: age at baseline (continuous, in years), cigarette smoking status (coded as never, former, current smoker), number of cigarettes smoked per day, and years of smoking (both continuous, centered), history of physician-diagnosed hypertension (no, yes) and diabetes (no, yes), body height (continuous, m), BMI (<18.5, 18.5-<25, 25-<30, ≥30 kg/m<sup>2</sup>), non-occupational physical activity (<30, 30-60, 61-90, ≥90 min/day), highest level of education (primary school or lower vocational, secondary or medium vocational, and higher vocational or university), intake of alcohol (0, 0.1-<5, 5-<15, 15-<30, 30+ g/day), nuts (0, 0.1-<5, 5-<10, 10+ g/day), vegetables and fruit (both continuous, g/day), energy (continuous, kcal/day), use of nutritional supplements (no, yes), and, in women, postmenopausal HRT (never, ever).

Supplementary Figure S1. Flow diagram of the number of subcohort members and deaths on which analyses are based, Netherlands Cohort Study.

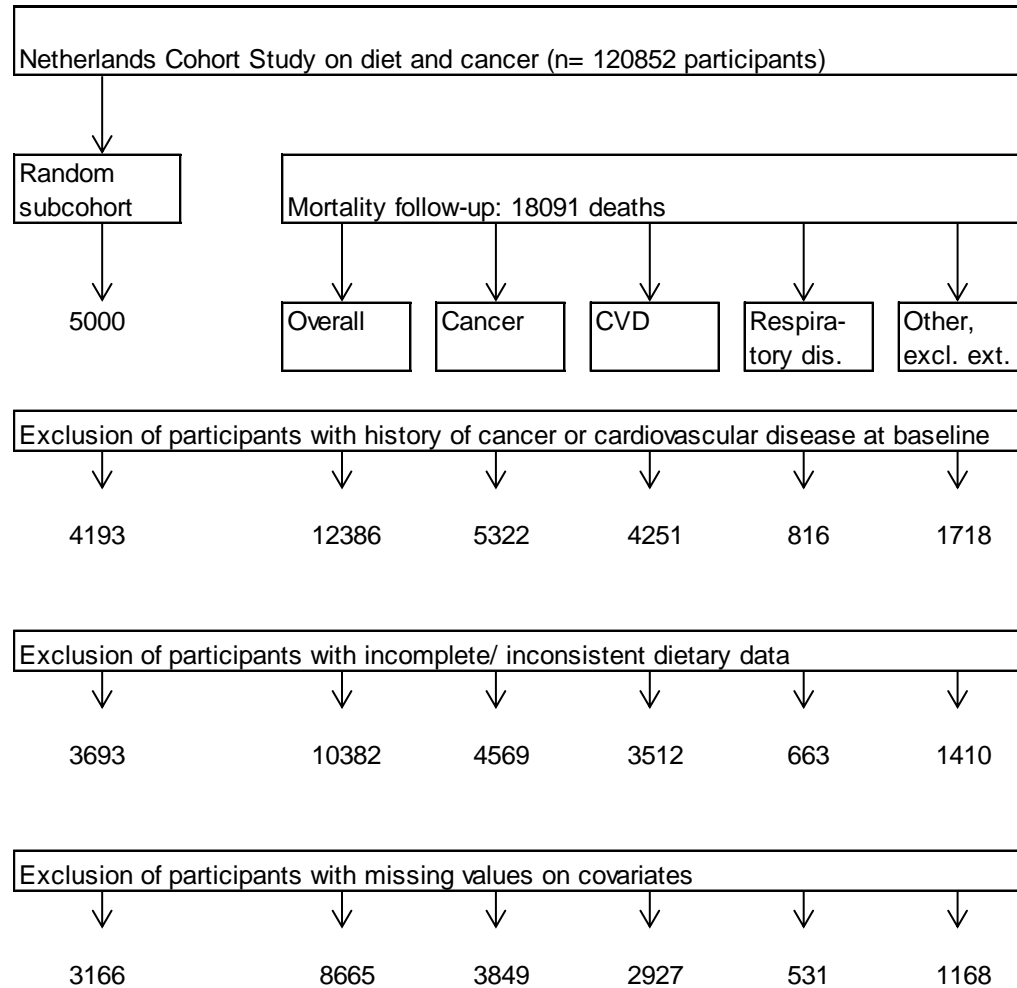

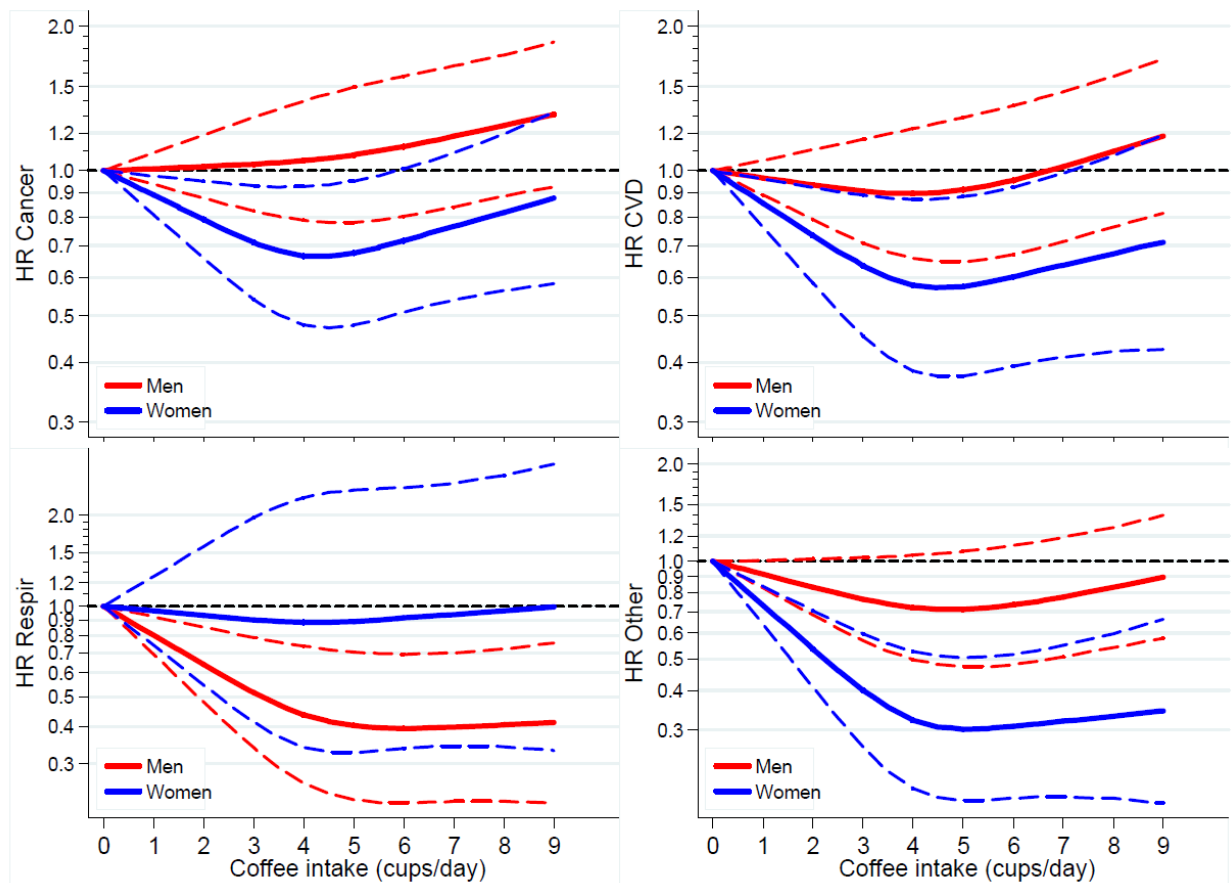

**Supplementary Figure S2.** Spline regression curves for the association between coffee intake and cause-specific mortality. Red lines: men. Blue lines: women.

Multivariate HRs are calculated by restricted cubic spline regression (using 3 knots at 10th, 50th, and 90th percentiles) adjusting for: age at baseline (continuous, in years), cigarette smoking status (coded as never, former, current smoker), number of cigarettes smoked per day, and years of smoking (both continuous, centered), history of physician-diagnosed hypertension (no, yes) and diabetes (no, yes), body height (continuous, m), BMI (<18.5, 18.5-<25, 25-<30, ≥30 kg/m<sup>2</sup>), non-occupational physical activity (<30, 30-60, 61-90, ≥90 min/day), highest level of education (primary school or lower vocational, secondary or medium vocational, and higher vocational or university), intake of alcohol (0, 0.1-<5, 5-<15, 15-<30, 30+ g/day), nuts (0, 0.1-<5, 5-<10, 10+ g/day), vegetables and fruit (both continuous, g/day), tea (continuous, cups/day), energy (continuous, kcal/day), use of nutritional supplements (no, yes), and, in women, postmenopausal HRT (never, ever).

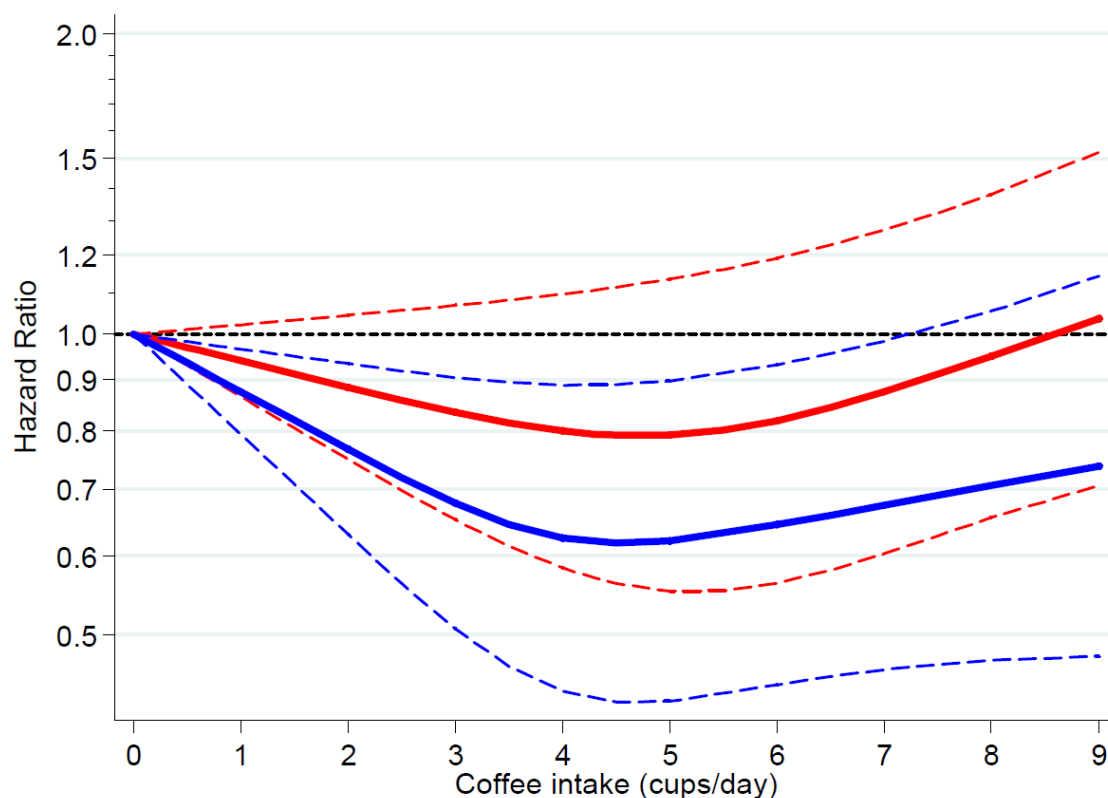

**Supplementary Fig S3.** Nonparametric regression curves for the association between coffee intake and total mortality, among stable coffee drinkers. Red lines: men. Blue lines: women. Solid lines represent point estimates and dashed lines represent 95% confidence intervals. Multivariate HRs are calculated by restricted cubic spline regression (using 3 knots at 10th, 50th, and 90th percentiles) adjusting for: age at baseline (continuous, in years), cigarette smoking status (coded as never, former, current smoker), number of cigarettes smoked per day, and years of smoking (both continuous, centered), history of physician-diagnosed hypertension (no, yes) and diabetes (no, yes), body height (continuous, m), BMI (<18.5, 18.5-<25, 25-<30, ≥30 kg/m<sup>2</sup>), non-occupational physical activity (<30, 30-60, 61-90, ≥90 min/day), highest level of education (primary school or lower vocational, secondary or medium vocational, and higher vocational or university), intake of alcohol (0, 0.1-<5, 5-<15, 15-<30, 30+ g/day), nuts (0, 0.1-<5, 5-<10, 10+ g/day), vegetables and fruit (both continuous, g/day), tea (continuous, cups/day), energy (continuous, kcal/day), use of nutritional supplements (no, yes), and, in women, postmenopausal HRT (never, ever).

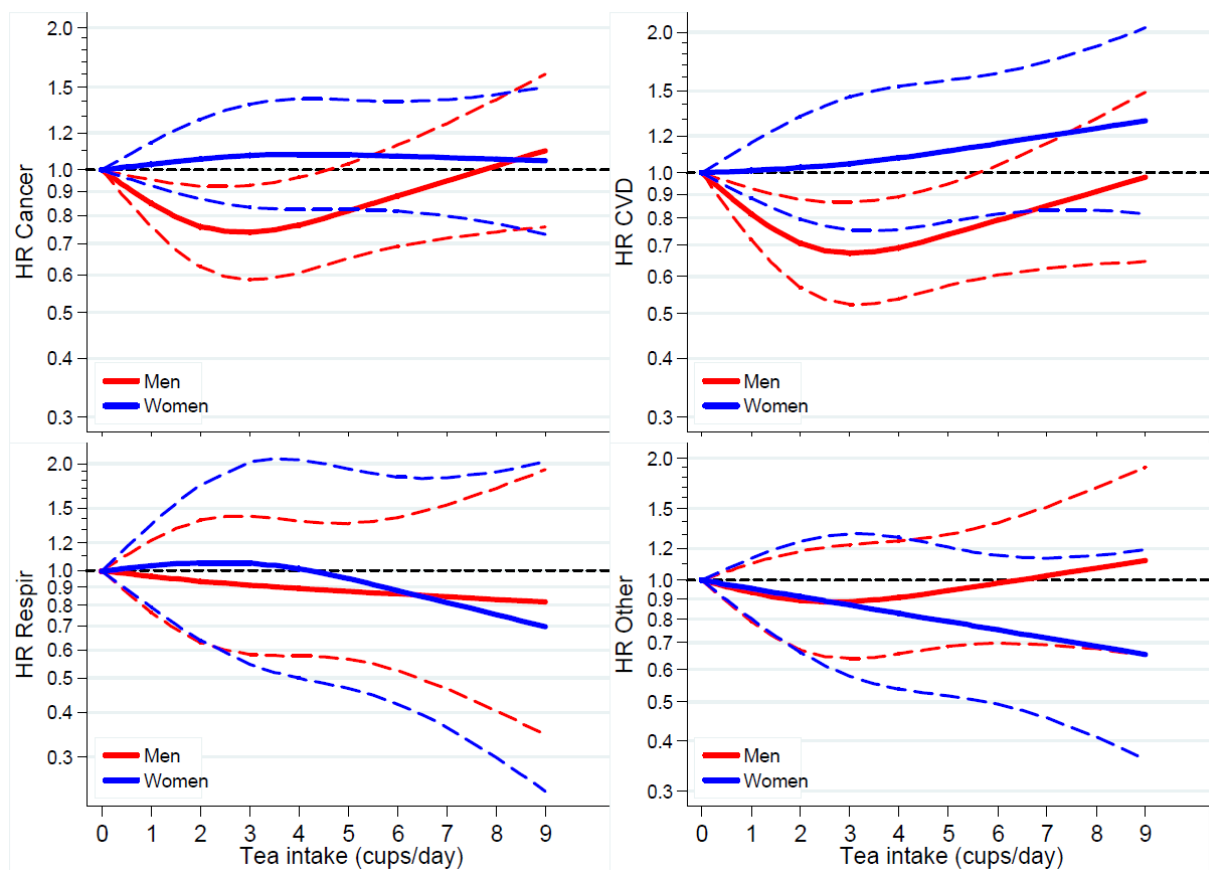

**Supplementary Fig S4.** Spline regression curves for the association between tea intake and cause-specific mortality. Red lines: men. Blue lines: women.

Multivariate HRs are calculated by restricted cubic spline regression (using 3 knots at 10th, 50th, and 90th percentiles) adjusting for: age at baseline (continuous, in years), cigarette smoking status (coded as never, former, current smoker), number of cigarettes smoked per day, and years of smoking (both continuous, centered), history of physician-diagnosed hypertension (no, yes) and diabetes (no, yes), body height (continuous, m), BMI (<18.5, 18.5-<25, 25-<30, ≥30 kg/m<sup>2</sup>), non-occupational physical activity (<30, 30-60, 61-90, ≥90 min/day), highest level of education (primary school or lower vocational, secondary or medium vocational, and higher vocational or university), intake of alcohol (0, 0.1-<5, 5-<15, 15-<30, 30+ g/day), nuts (0, 0.1-<5, 5-<10, 10+ g/day), vegetables and fruit (both continuous, g/day), coffee (continuous, cups/day), energy (continuous, kcal/day), use of nutritional supplements (no, yes), and, in women, postmenopausal HRT (never, ever).

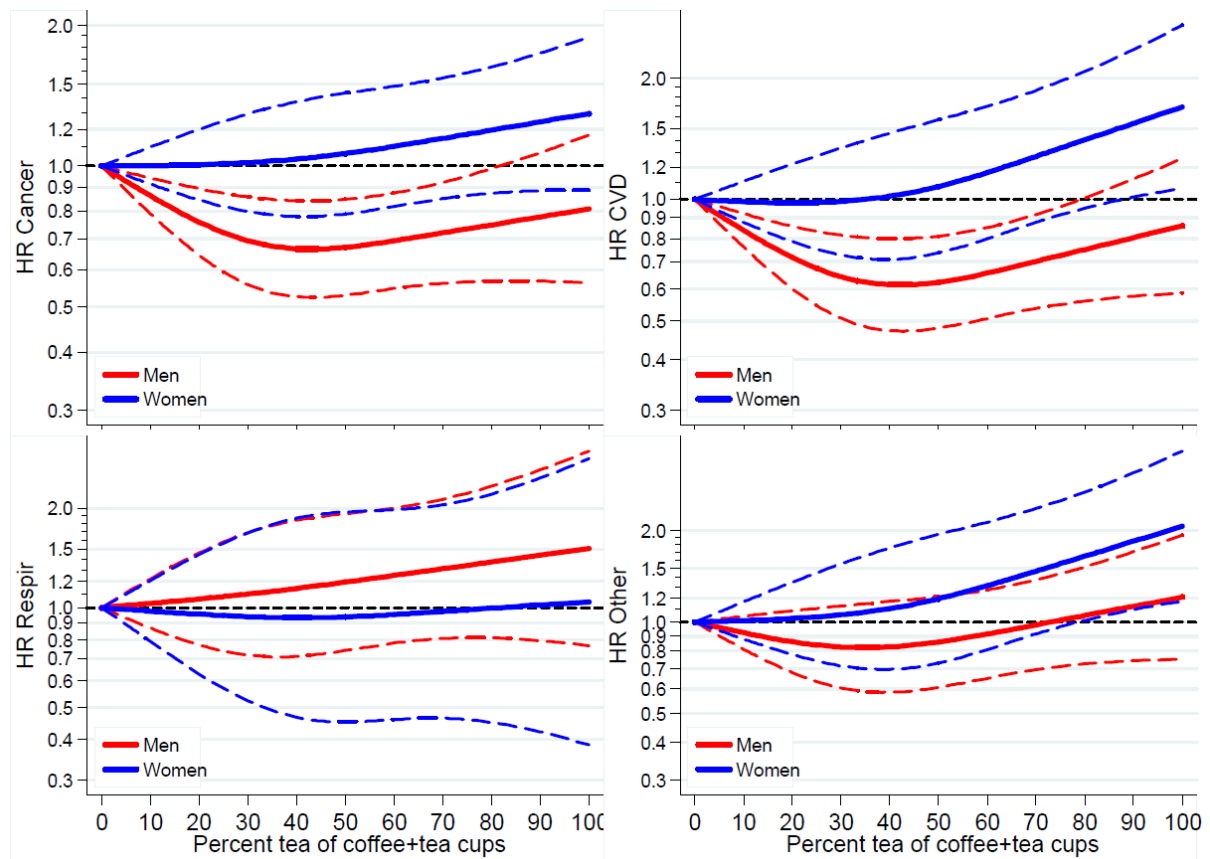

**Supplementary Fig S5.** Spline regression curves for the association between percentage tea of total coffee and tea and cause-specific mortality in substitution analyses. Red lines: men. Blue lines: women.

Multivariate HRs are calculated by restricted cubic spline regression (using 3 knots at 10th, 50th, and 90th percentiles) adjusting for: age at baseline (continuous, in years), cigarette smoking status (coded as never, former, current smoker), number of cigarettes smoked per day, and years of smoking (both continuous, centered), history of physician-diagnosed hypertension (no, yes) and diabetes (no, yes), body height (continuous, m), BMI (<18.5, 18.5-<25, 25-<30, ≥30 kg/m<sup>2</sup>), non-occupational physical activity (<30, 30-60, 61-90, ≥90 min/day), highest level of education (primary school or lower vocational, secondary or medium vocational, and higher vocational or university), intake of alcohol (0, 0.1-<5, 5-<15, 15-<30, 30+ g/day), nuts (0, 0.1-<5, 5-<10, 10+ g/day), vegetables and fruit (both continuous, g/day), coffee+tea (continuous, cups/day), energy (continuous, kcal/day), use of nutritional supplements (no, yes), and, in women, postmenopausal HRT (never, ever).

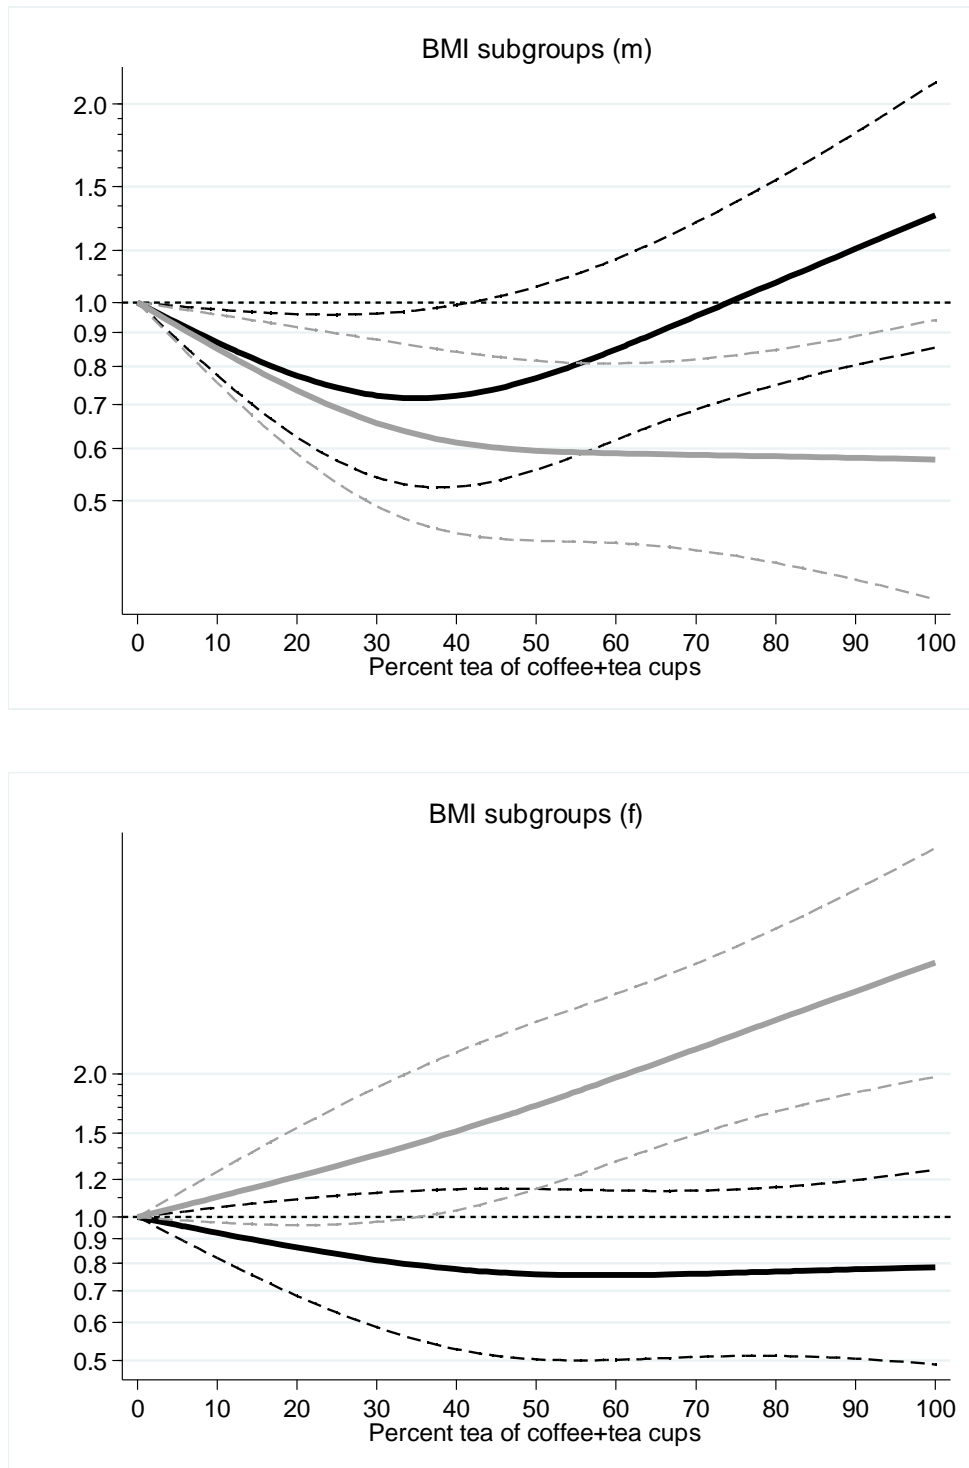

**Supplementary Fig S6.** Nonparametric regression curves for the association between percentage tea of total coffee and tea and total mortality in subgroups of BMI, in males and females, respectively. Black lines: BMI category 18.5-25 kg/m<sup>2</sup>. Grey lines: BMI category 25+ kg/m<sup>2</sup>. Multivariate HRs are calculated by restricted cubic spline regression (using 3 knots at 10th, 50th, and 90th percentiles) adjusting for: age at baseline (continuous, in years), cigarette smoking status (coded as never, former, current smoker), number of cigarettes smoked per day, and years of smoking (both continuous, centered), history of physician-diagnosed hypertension (no, yes) and diabetes (no, yes), body height (continuous, m), non-occupational physical activity (<30, 30-60, 61-90, ≥90 min/day), highest level of education (primary school or lower vocational, secondary or medium vocational, and higher vocational or university), intake of alcohol (0, 0.1-<5, 5-<15, 15-<30, 30+ g/day), nuts (0, 0.1-<5, 5-<10, 10+ g/day), vegetables and fruit (both continuous, g/day), coffee+tea (continuous, cups/day), energy (continuous, kcal/day), use of nutritional supplements (no, yes), and, in women, postmenopausal HRT (never, ever).

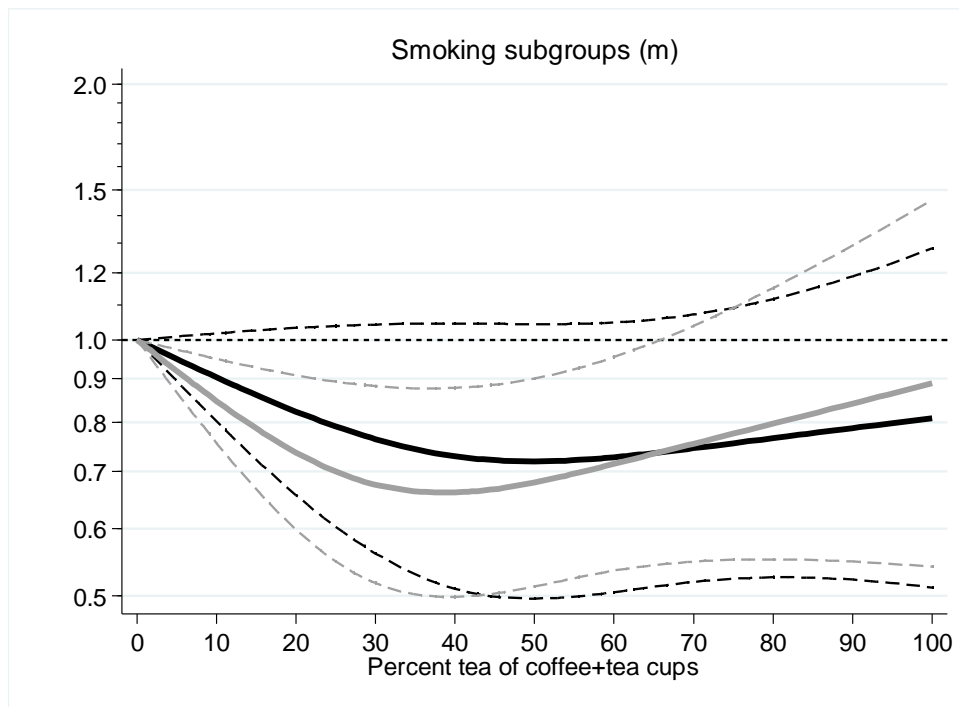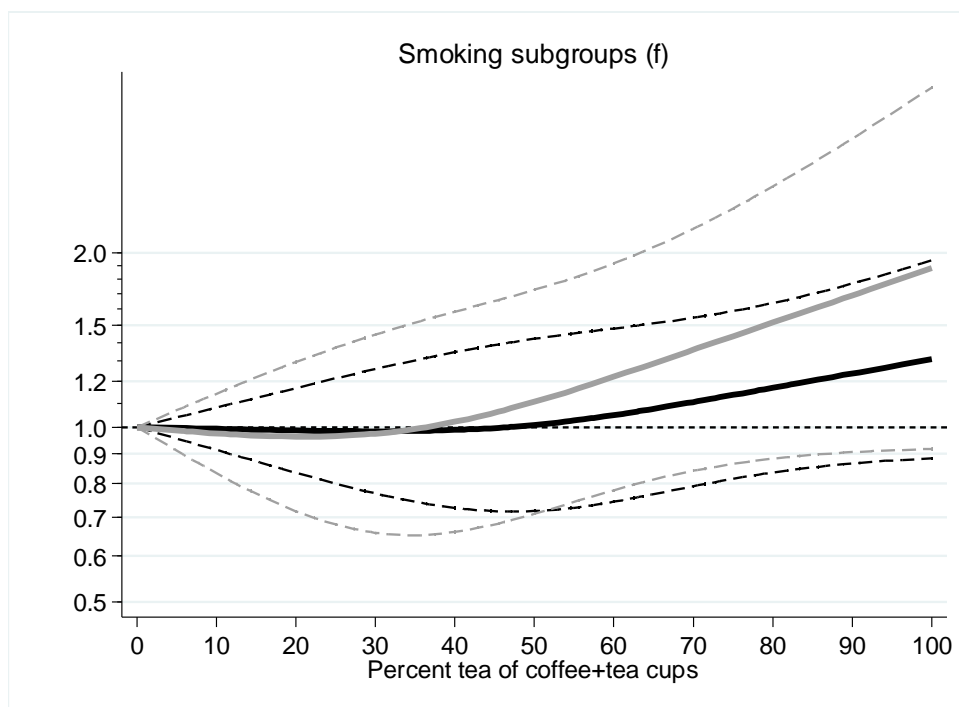

**Supplementary Fig S7.** Nonparametric regression curves for the association between percentage tea of total coffee and tea and total mortality in subgroups of smoking, in males and females, respectively. Black lines: Never smokers or those who stopped  $\geq 10$  y ago. Grey lines: Current smokers or stopped  $< 10$  y ago.

Multivariate HRs are calculated by restricted cubic spline regression (using 3 knots at 10th, 50th, and 90th percentiles) adjusting for: age at baseline (continuous, in years), number of cigarettes smoked per day and years of smoking (both continuous, centered), history of physician-diagnosed hypertension (no, yes) and diabetes (no, yes), body height (continuous, m), BMI ( $< 18.5$ ,  $18.5$ - $< 25$ ,  $25$ - $< 30$ ,  $\geq 30$  kg/m<sup>2</sup>), non-occupational physical activity ( $< 30$ ,  $30$ - $60$ ,  $61$ - $90$ ,  $\geq 90$  min/day), highest level of education (primary school or lower vocational, secondary or medium vocational, and higher vocational or university), intake of alcohol (0,  $0.1$ - $< 5$ ,  $5$ - $< 15$ ,  $15$ - $< 30$ ,  $30$ + g/day), nuts (0,  $0.1$ - $< 5$ ,  $5$ - $< 10$ ,  $10$ + g/day), vegetables and fruit (both continuous, g/day), coffee+tea (continuous, cups/day), energy (continuous, kcal/day), use of nutritional supplements (no, yes), and, in women, postmenopausal HRT (never, ever).
